# Supplementary material for: Quantifying the contribution of long-range transport to particulate matter (PM) mass loadings at a suburban site in the north-western Indo-Gangetic Plain (NW-IGP)
Source: Copernicus journal article supplement (doi:10.5194/acp-15-9501-2015), 2015-08-26
Supplement: Supplementary file 2 [file acp-15-9501-2015-supplement.zip]

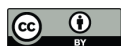

## *Supplement of*

# **Quantifying the contribution of long-range transport to particulate matter (PM) mass loadings at a suburban site in the north-western Indo-Gangetic Plain (NW-IGP)**

**H. Pawar et al.**

*Correspondence to:* B. Sinha (bsinha@iisermohali.ac.in)

- acp-15-9501-2015-supplement-title-page.pdf
- supplement
  - acpd-15-11409-2015-s01.pdf
  - acpd-15-11409-2015-sf01.jpg
  - acpd-15-11409-2015-sf02.jpg
  - acpd-15-11409-2015-sf03.jpg
  - acpd-15-11409-2015-st01.xlsx

The copyright of individual parts of the supplement might differ from the CC-BY 3.0 licence.
